# Supplementary material
Source: publisher figshare collection journal article supplement (https://plos.figshare.com/articles/dataset/_/115269)

| T°   | OD<br>600nm | MTX 0.5%       |                |                |                | MTX 1.0%       |                |                |                | MTX 2.0%       |                |                |                |
|------|-------------|----------------|----------------|----------------|----------------|----------------|----------------|----------------|----------------|----------------|----------------|----------------|----------------|
|      |             | <i>S. cer.</i> | <i>S. par.</i> | <i>S. kud.</i> | <i>S. uva.</i> | <i>S. cer.</i> | <i>S. par.</i> | <i>S. kud.</i> | <i>S. uva.</i> | <i>S. cer.</i> | <i>S. par.</i> | <i>S. kud.</i> | <i>S. uva.</i> |
| 22°C | 0.0002      | *              | *              | ***            | *              | **             | *              | ***            | **             | *              | *              | **             | *              |
|      | 0.002       | **             | **             | ***            | *              | **             | **             | ***            | *              | *              | ***            | ***            | *              |
|      | 0.02        | **             | ***            | ***            | n.s.           | **             | ***            | ***            | *              | **             | *              | **             | **             |
|      | 0.2         | **             | ***            | ***            | *              | **             | **             | ***            | *              | *              | ***            | ***            | *              |
|      | 2           | *              | *              | *              | n.s.           | *              | *              | *              | *              | *              | *              | *              | *              |
|      |             |                |                |                |                |                |                |                |                |                |                |                |                |
| 25°C | 0.0002      | ***            | *              | **             | ***            | *              | *              | ***            | ***            | ***            | *              | **             | *              |
|      | 0.002       | ***            | **             | **             | **             | ***            | *              | ***            | ***            | ***            | **             | **             | **             |
|      | 0.02        | *              | ***            | ***            | *              | ***            | ***            | ***            | **             | **             | **             | **             | ***            |
|      | 0.2         | **             | ***            | ***            | *              | ***            | **             | ***            | *              | **             | **             | ***            | **             |
|      | 2           | *              | *              | ***            | *              | **             | **             | ***            | *              | *              | *              | *              | *              |
|      |             |                |                |                |                |                |                |                |                |                |                |                |                |
| 30°C | 0.0002      | **             | *              | **             | *              | **             | *              | ***            | *              | ***            | n.s.           | ***            | *              |
|      | 0.002       | **             | *              | **             | *              | ***            | **             | ***            | *              | ***            | *              | ***            | **             |
|      | 0.02        | ***            | **             | ***            | **             | ***            | ***            | ***            | **             | ***            | **             | ***            | ***            |
|      | 0.2         | **             | **             | ***            | ***            | ***            | ***            | ***            | **             | ***            | ***            | ***            | ***            |
|      | 2           | *              | *              | *              | **             | **             | **             | **             | **             | *              | **             | *              | *              |
|      |             |                |                |                |                |                |                |                |                |                |                |                |                |

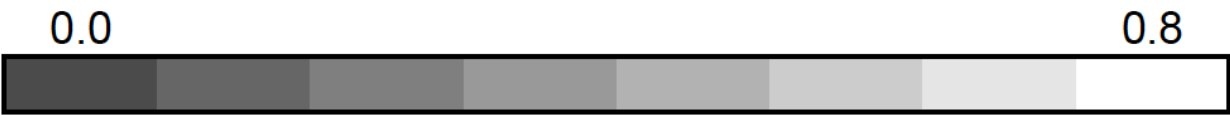

Supplement: Supplementary file [file 1]
