# Supplementary material
Source: publisher figshare collection journal article supplement (https://plos.figshare.com/articles/dataset/_/115269)
Supplement: Supplementary file [file 1]

## MATa

Saturated culture in 200µl YPD  
+ cloNAT in 96-well plate

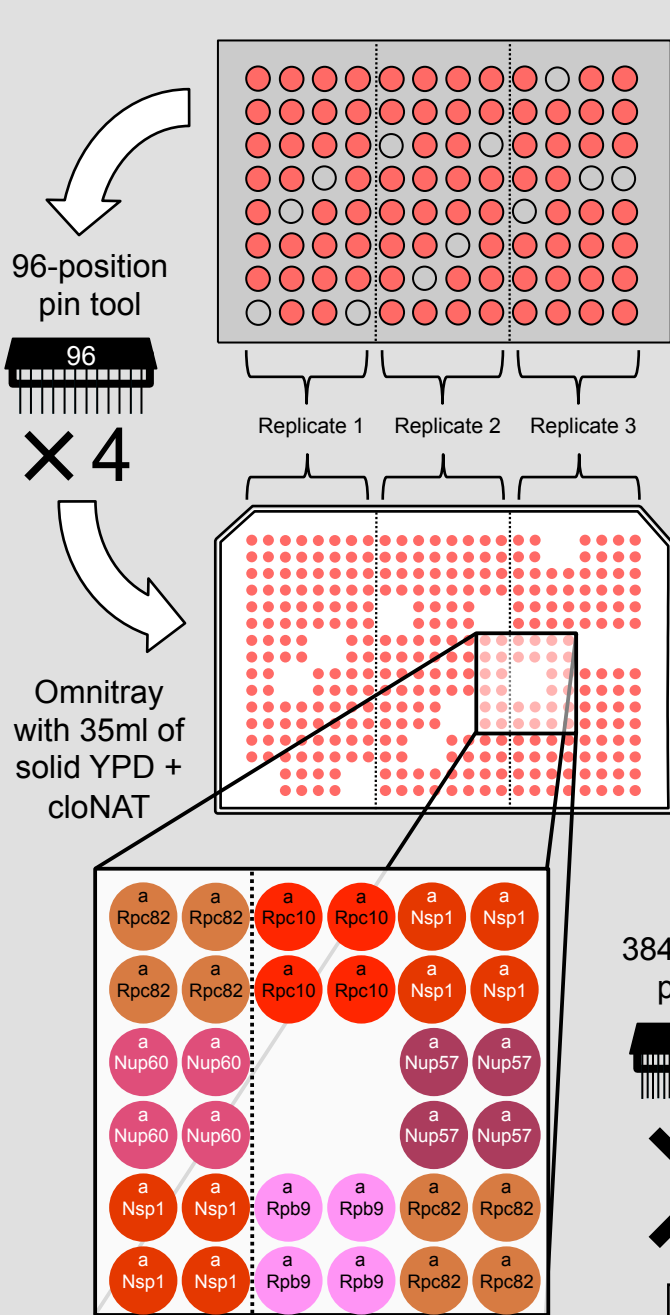

## MATα

Saturated culture in 35ml YPD  
+ hygromycin in 50 ml tube

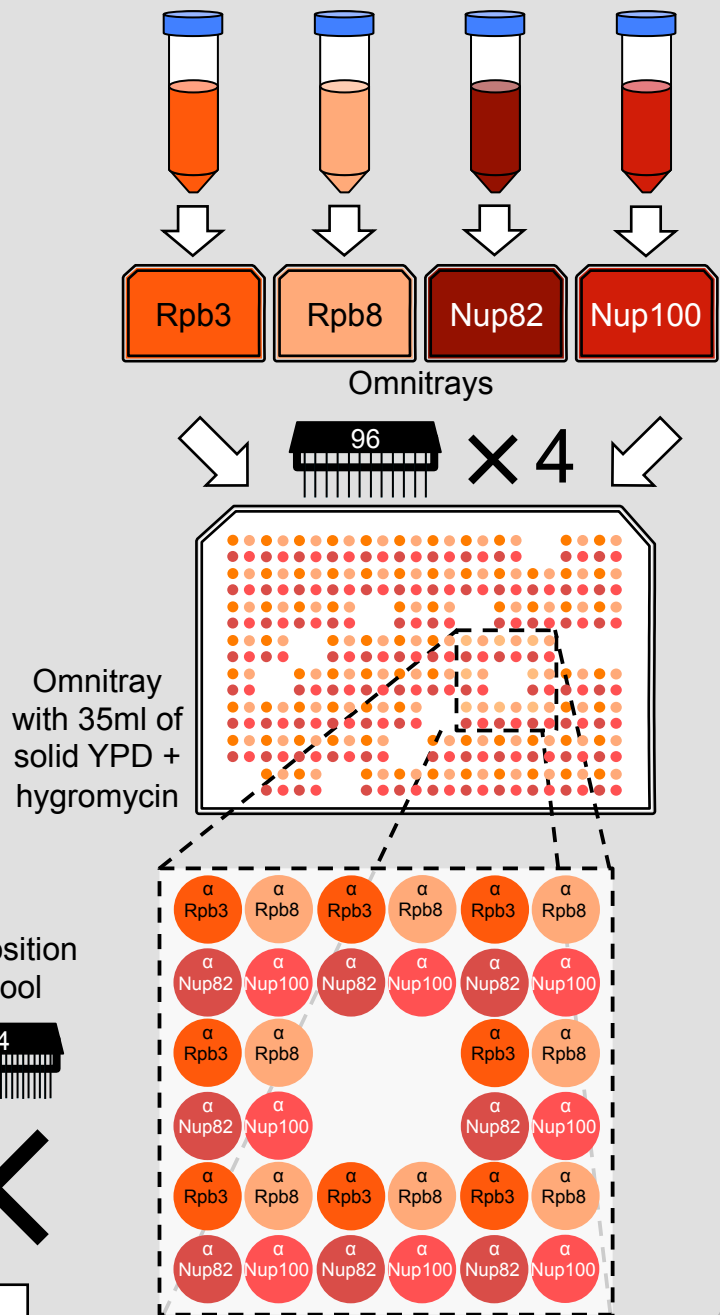

**MATING:** Omnitray with  
35ml of solid YPD

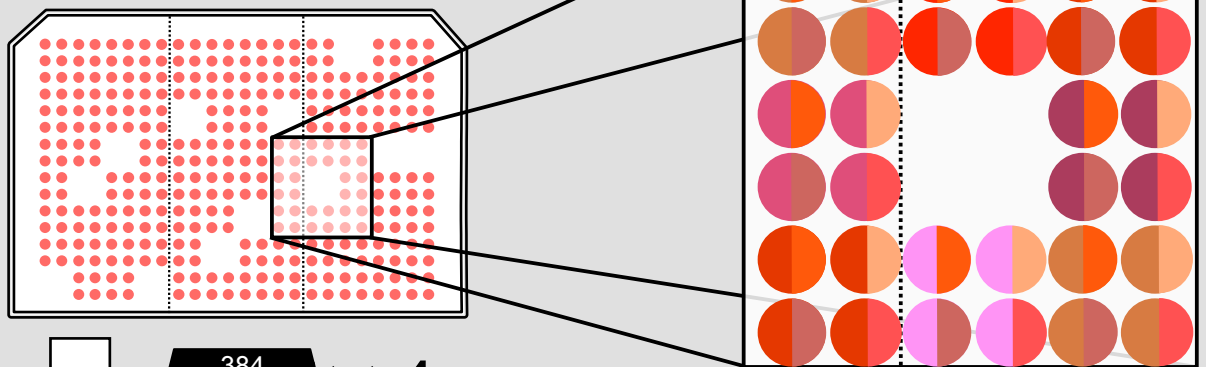

## MATa/α

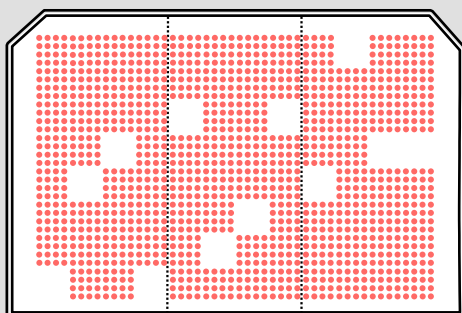

**DIPLOID SELECTION:**  
Omnitray with 35ml of solid  
YPD + cloNAT + hygromycin

1536-position  
pin tool

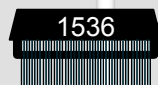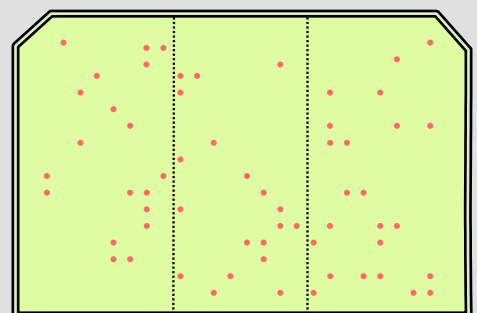

**SCREEN OF PPIs:**  
Omnitray with 35ml of solid  
synthetic media -ade +MTX
